# Supplementary material for: Pain without gain? A randomized crossover study on the impact of active and passive foam rolling on jump height and pain intensity
Source: PeerJ. 2025 Jul 30;13:e19747. doi: 10.7717/peerj.19747 (PMC12317690; doi:10.7717/peerj.19747)
Supplement: Supplemental Information 1 [file peerj-13-19747-s001.xlsx]

## Sheet: Raw Data
ID	name	sex	treatment order	height [cm]	weight [kg]	Treatment	CMJ Pre warm-up [cm]	CMJ Post warm-up [cm]	CMJ Post treatment [cm]	Delta Pre warm-up / Post warm-up [%]	Delta Post warm-up / Post treatment [%]	vertical force thigh [N]	% vertical force of body weight	mean vertical force thigh [N]	mean vertical force calf [N]	max vertical force [N, thigh,proximal]	max vertical force [N, thigh,distal]	max vertical force [N, calf,proximal]	max vertical force [N, calf,distal]	% mean force of body weight [thigh, total]	% mean force of body weight [calf, total]	% max force of body weight [thigh,proximal]	% max force of body weight [thigh,distal]	% max force of body weight [calf,proximal]	% max force of body weight [calf,distal]	Pain [VAS]
FR_17	A	m	P-A	172	62.8	PFR	31.0633	34.2583	31.1954	0.102854	-0.0894071	208.953	33.9172													4.6
FR_10	B	m	A-P	170	88.1	PFR	33.3569	33.9679	30.5954	0.0183183	-0.0992861	258.003	29.8524													9.5
FR_11	C	m	P-A	175	86.4	PFR	36.6576	36.3309	32.3984	-0.00891166	-0.10824	258.003	30.4398													6.85
FR_06	D	m	P-A	170.5	71.8	PFR	37.1649	34.8885	32.3571	-0.0612537	-0.0725568	208.953	29.6657													7.2
FR_13	E	m	A-P	180	75.7	PFR	27.1078	24.3837	25.607	-0.100491	0.0501697	233.478	31.4399													7.7
FR_09	F	m	A-P	183	94.8	PFR	33.0416	29.6068	28.7339	-0.103953	-0.0294825	159.903	32.2772													3
FR_08	G	m	A-P	169.5	60.2	PFR	28.11	30.7413	30.3256	0.0936072	-0.0135231	208.953	34.2444													9.1
FR_14	H	m	A-P	184.5	80.4	PFR	18.9212	20.7682	19.5917	0.0976188	-0.0566511	184.428	33.0986													5.9
FR_20	I	m	P-A	189	88.3	PFR	35.4568	36.4113	33.7181	0.026921	-0.0739673	233.478	32.2493													7.5
FR_05	J	m	P-A	176	76.5	PFR	26.7202	28.9961	26.2694	0.0851755	-0.0940382	184.428	34.1818													6.4
FR_19	K	f	P-A	159	50.5	PFR	20.3419	21.1138	18.4598	0.0379446	-0.1257	307.053	32.9474													6.7
FR_04	L	f	A-P	171	62.2	PFR	20.2418	20.6518	19.7011	0.020253	-0.0460371	184.428	31.2292													8.4
FR_01	M	f	P-A	158.5	56.8	PFR	22.4497	24.0346	21.4893	0.0705957	-0.1059	258.003	29.7848													7.1
FR_02	N	f	P-A	172	73.8	PFR	25.1317	27.3098	24.2086	0.0866673	-0.113558	233.478	31.1111													4.7
FR_12	O	f	A-P	162	55	PFR	28.6141	30.2792	29.0212	0.0581939	-0.0415467	258.003	32.7114													6
FR_18	P	f	A-P	165.5	64.4	PFR	20.5349	20.7553	19.5971	0.0107333	-0.0558036	208.953	33.0745													1.4
FR_07	Q	f	A-P	168	62.8	PFR	24.0526	25.1741	22.62	0.0466294	-0.101459	208.953	33.9172													4.3
FR_15	R	f	A-P	167.5	68.7	PFR	19.025	20.762	18.5509	0.0913	-0.106495	208.953	31.0044													6
FR_03	S	f	P-A	164	67.4	PFR	19.9596	21.0449	19.5554	0.0543727	-0.070773	208.953	31.6024													3.35
FR_16	T	f	P-A	176	80.2	PFR	19.7346	19.9612	18.0219	0.0114824	-0.0971542	258.003	32.793													5.4
FR_17	A	m	P-A	172	62.8	AFR	32.9868	33.4567	32.1084	0.0142454	-0.0403008			261	195.25	425	196	336	94.8	42.3655	31.6929	68.949	31.8471	54.6178	15.4459	1.1
FR_10	B	m	A-P	170	88.1	AFR	32.3712	32.0635	30.3983	-0.0095049	-0.0519346			274.5	286	506	216	410	202	31.7612	33.0919	58.5698	24.9716	47.4461	23.3825	6.9
FR_11	C	m	P-A	175	86.4	AFR	38.9107	40.0413	35.7244	0.0290574	-0.107811			400	274.5	651	253	441	168	47.193	32.3862	76.8519	29.8611	52.0833	19.7917	2.75
FR_06	D	m	P-A	170.5	71.8	AFR	32.9397	34.0067	30.7506	0.0323923	-0.0957485			317.5	257.25	528	181	426	149	45.0765	36.5226	74.9304	25.766	60.3064	21.1699	0.9
FR_13	E	m	A-P	180	75.7	AFR	27.4996	25.6739	25.3679	-0.0663899	-0.0119199			288.25	228	502	234	341	161	38.8154	30.7022	67.6354	24.4386	57.3316	20.0793	7.7
FR_09	F	m	A-P	183	94.8	AFR	34.8893	34.0419	32.7633	-0.0242893	-0.0375586			216.5	182.75	342	162	275	108	43.7016	36.889	69.1089	32.6733	55.4455	21.7822	5.3
FR_08	G	m	A-P	169.5	60.2	AFR	30.4435	29.7365	29.3971	-0.0232239	-0.011414			264	202.25	466	154	323	122	43.2658	33.1458	76.3666	25.2412	52.8939	19.9357	7.6
FR_14	H	m	A-P	184.5	80.4	AFR	19.3114	21.3325	19.8725	0.10466	-0.0684434			215.25	193.5	410	117	290	137	38.6301	34.7267	73.5915	20.9507	52.1127	24.6479	3.6
FR_20	I	m	P-A	189	88.3	AFR	33.719	34.7834	34.4389	0.0315683	-0.00990534			356.75	220	566	236	370	93.4	49.2764	30.3877	78.1843	32.6558	51.084	12.8726	3.4
FR_05	J	m	P-A	176	76.5	AFR	28.0659	28.7006	26.8843	0.0226164	-0.0632861			258	203.25	473	174	304	126	47.8176	37.6703	87.6364	32.1818	56.3636	23.2727	0.5
FR_19	K	f	P-A	159	50.5	AFR	20.1841	20.5148	19.4998	0.0163871	-0.0494785			515	299	697	395	458	181	55.2605	32.0833	74.7368	42.4211	49.1579	19.4737	0.5
FR_04	L	f	A-P	171	62.2	AFR	21.0218	22.3008	19.567	0.0608427	-0.122589			177	164.75	335	129	294	103	29.9715	27.8972	56.6445	21.7608	49.8339	17.4419	6.5
FR_01	M	f	P-A	158.5	56.8	AFR	22.8678	24.1089	23.5933	0.0542761	-0.0213875			278	306.25	458	233	448	236	32.0934	35.3546	52.8879	26.9536	51.7554	27.2933	2.6
FR_02	N	f	P-A	172	73.8	AFR	25.3224	26.2541	25.2446	0.0367947	-0.0384517			298	258.5	553	240	387	98.1	39.7087	34.4453	73.7255	32.0261	32.0261	13.0719	0.8
FR_12	O	f	A-P	162	55	AFR	28.9771	30.7298	29.9278	0.0604864	-0.0260963			265.25	232	476	291	434	133	33.6303	29.4146	60.3234	36.9403	54.9751	16.9154	4.2
FR_18	P	f	A-P	165.5	64.4	AFR	18.2065	21.2403	21.4394	0.166634	0.00937564			295.5	193.25	520	186	386	61.4	46.7738	30.589	82.2981	29.5031	61.0248	9.78261	4.4
FR_07	Q	f	A-P	168	62.8	AFR	23.1402	24.6273	22.5342	0.0642615	-0.0849879			212	186.75	427	150	309	85.4	34.4118	30.3132	69.2675	24.3631	50.1592	13.8535	5
FR_15	R	f	A-P	167.5	68.7	AFR	19.6639	19.9576	20.046	0.0149355	0.00443085			278.75	190.75	535	159	307	104	41.3608	28.3034	79.3304	23.5808	45.5604	15.4294	4.9
FR_03	S	f	P-A	164	67.4	AFR	19.19	21.0583	20.9306	0.0973616	-0.00606395			341.25	188.25	563	271	318	75.4	51.6112	28.4712	85.1632	40.9496	48.0712	11.4243	3.35
FR_16	T	f	P-A	176	80.2	AFR	19.3321	19.8828	17.7295	0.028485	-0.108296			307.75	273	601	257	441	185	39.116	34.6992	76.4339	32.6683	56.1097	23.5661	5.9
